# Supplementary material for: Trajectory of Cognitive Decline Before and After Stroke in 14 Population Cohorts
Source: PubMed Central journal article supplement (PMC11447567; doi:10.1001/jamanetworkopen.2024.37133), 2024-10-02
Supplement: jamanetwopen-e2437133-s001.pdf [file jamanetwopen-e2437133-s001.pdf]

## Supplemental Online Content

Lo JW, Crawford JD, Lipnicki DM, et al. Trajectory of cognitive decline before and after stroke in 14 population cohorts. *JAMA Netw Open*. 2024;7(10):e2437133. doi:10.1001/jamanetworkopen.2024.37133

**eMethods.** Multiple Imputation

**eTable 1.** Dementia Diagnosis Criteria and Information About Each Included Study

**eTable 2.** Stroke Data From Each Study

**eTable 3.** Criteria for Harmonized Baseline Factors

**eTable 4.** Harmonization of Baseline Vascular Risk Factors for Each Study

**eTable 5.** Missing Data for Each Variable

**eTable 6.** Neuropsychological Tests Used in Each Study for Each Cognitive Domain

**eTable 7.** Interpretation of Model Coefficients

**eTable 8.** Participant Baseline Characteristics by Study

**eTable 9.** Participant Medical History at Baseline Assessment by Study

**eTable 10.** Baseline Characteristics of Participants Followed up Until the Last Assessment Versus Participants Who Dropped Out

**eTable 11.** Examination of Demographic and Vascular Risk Factor Individually in the Unadjusted Model

**eTable 12.** Missing Data on Covariates Included in the Adjusted Model

**eTable 13.** Unadjusted Estimates of Cognitive Changes in Global Cognition

**eTable 14.** Mean Values of Covariates Included the Adjusted Model

**eTable 15.** Examination of Difference in Cognitive Trajectories Before Stroke Compared With Cognitive Trajectories in Those Without Stroke

**eTable 16.** Sensitivity Analyses

**eTable 17.** Adjusted Estimates of Changes in Cognitive Function in the 4 Cognitive Domains and MMSE Among all Participants

**eTable 18.** Subgroup Analyses in Stroke Group and No-Stroke Group in Cognitive Domains and MMSE

**eTable 19.** Examination of Moderating Effects in the Trajectory of Poststroke Cognitive Function

**eTable 20.** Stratified Analyses for Age Groups With Global Cognition as the Outcome

**eTable 21.** Stratified Analyses for Diabetes Groups With Global Cognition as the Outcome

**eFigure 1.** Follow-up Schedule for Each Contributing Study

**eFigure 2.** Predicted Values of Global Cognition for Participants Aged Younger Than 72 and 72 Years and Older

**eFigure 3.** Predicted Values of Global Cognition for Participants With and Without Diabetes

**eFigure 4.** Predicted Values of Global Cognition Among all Participants and in Subgroups, With 95% CI

**eFigure 5.** Predicted Values of Cognitive Function in Each Domain and MMSE Among all Participants, With 95% CI

This supplemental material has been provided by the authors to give readers additional information about their work.

## **eMethods. Multiple Imputation**

We assumed that missing data was missing at random (MAR) and multiple imputation (MI) using chained equations was used to impute missing covariates. All baseline covariates including baseline global cognition and domain scores, as well as demographic data were included in the imputation model. Follow up data were not included in the imputation because each study and participant have different follow up schedules. Since some covariates (APOE4, CVD, high cholesterol, and physical activity) were missing completely in some studies, imputation was performed in the full sample. Since the clustering of studies was not the focus of our analysis, we ignored the clustering of studies in the imputation model for simplicity and only allow for it in the analysis model [White et al. 2011].

The fraction of incomplete data in the adjusted model was about 20 per cent, hence we used 20 imputations as recommended in [White et al. 2011].

Reference:

White IR, Royston P, Wood AM. Multiple imputation using chained equations: Issues and guidance for practice. *Stat Med*. 2011;30(4):377-99. doi: 10.1002/sim.4067.

**eTable 1. Dementia Diagnosis Criteria and Information About Each Included Study**

| <b>Study name (acronym)</b>                                    | <b>Diagnostic criteria for dementia at baseline <sup>a</sup></b>                                  | <b>About study/ Recruitment strategies <sup>b</sup></b>                                                                                                                                                                                                                                                                                                                                                                                                                                    |
|----------------------------------------------------------------|---------------------------------------------------------------------------------------------------|--------------------------------------------------------------------------------------------------------------------------------------------------------------------------------------------------------------------------------------------------------------------------------------------------------------------------------------------------------------------------------------------------------------------------------------------------------------------------------------------|
| Einstein Aging Study ( <b>EAS</b> )                            | DSM-IV                                                                                            | Between 1993 and 2004, Health Care Financing Administration/ Centers for Medicaid and Medicare Services (HCFA/CMS) rosters of Medicare eligible persons aged 70 and above were used to develop sampling frames of community residing participants in Bronx County in the US. Since 2004, New York City Board of Elections registered voter lists for the Bronx have been used due to changes in policies for release of HCFA/CMS rosters.                                                  |
| Epidemiology of Dementia in Central Africa ( <b>EPIDEMCA</b> ) | DSM-IV and NINCDS-ADRDA criteria                                                                  | A multicenter population-based study was carried out in Central African Republic and Republic of Congo between 2011 and 2012 including both urban and rural sites in each country. Follow up was performed in Congo only and therefore, the sample for this project included the subsample from Congo.                                                                                                                                                                                     |
| EpiFloripa Aging Study ( <b>EpiFloripa</b> )                   | MMSE ( $\leq 17$ <sup>c</sup> )                                                                   | The EpiFloripa Aging Study was carried out in the urban area of Florianópolis, State of Santa Catarina, located in the southern region of Brazil. The sample selection process was carried out by conglomerates in two steps. The units of the first step were the census tracts (IBGE census units) and the units of the second step were the households. Households were randomly selected. Mortality data linkage and active search for participants were used as follow-up strategies. |
| Etude SanteÂ Psychologique et Traitement ( <b>ESPRIT</b> )     | Neurologist interviews with cognitive testing; diagnoses validated by an independent expert panel | The Esprit Study is a neuropsychiatric cohort study of community dwelling people aged 65 years and over drawn at random from the electoral rolls of Montpellier in the south of France and recruited between 1999 and 2001.                                                                                                                                                                                                                                                                |
| Gothenburg H70 Birth Cohort Studies ( <b>H70 study</b> )       | DSM-III-R                                                                                         | The Gothenburg H70 Birth Cohort Studies are multidisciplinary epidemiological studies examining representative birth cohorts of older populations in Gothenburg, Sweden. The first study started in 1971. Each birth cohorts were systematically selected from the Swedish Revenue Office Register. Participants could opt to take the examination over several days, and home visits were also offered as an alternative.                                                                 |
| Invecchiamento Cerebrale in Abbiategrasso ( <b>Invece.Ab</b> ) | DSM-IV                                                                                            | Eligible population comprises all people born between 1935 and 1939 who were residents living in Abbiategrasso, Milan, Italy on the start date of the study. All 1773 people born between 1935–39 residing in Abbiategrasso were contacted, a list obtained from the municipal registry office. Personalization of successive contacts were used.                                                                                                                                          |
| Leipzig Longitudinal Study of the Aged ( <b>LEILA75+</b> )     | DSM-IV                                                                                            | A total of 1500 community-dwelling individuals aged 75 years and over living in the community of Leipzig-South were identified by systematic random sampling from an age-ordered list provided by the official registry office for each of the seven subdistricts. Face-to-face interviews were conducted, and proxy interviews were performed with relatives of fragile and functionally dependent individuals.                                                                           |
| <b>Study name (acronym)</b>                                    | <b>Diagnostic criteria for dementia at baseline <sup>a</sup></b>                                  | <b>About study/ Recruitment strategies <sup>b</sup></b>                                                                                                                                                                                                                                                                                                                                                                                                                                    |

|                                                                           |                                                                                             |                                                                                                                                                                                                                                                                                                                                                                                                                                                                                                                                                                                                                                                   |
|---------------------------------------------------------------------------|---------------------------------------------------------------------------------------------|---------------------------------------------------------------------------------------------------------------------------------------------------------------------------------------------------------------------------------------------------------------------------------------------------------------------------------------------------------------------------------------------------------------------------------------------------------------------------------------------------------------------------------------------------------------------------------------------------------------------------------------------------|
| Monongahela-Youghiogheny Healthy Aging Team ( <b>MYHAT</b> )              | CDR ( $\geq 1$ )                                                                            | An age-stratified sample of 2036 individuals aged 65+ years was drawn from the electoral rolls of a U.S. community, excluding individuals with severe cognitive impairment.                                                                                                                                                                                                                                                                                                                                                                                                                                                                       |
| Personality and Total Health Through Life Project ( <b>PATH</b> )         | DSM-IV                                                                                      | The sample was drawn from the electoral rolls of the three federal electorates that make up the Australian Capital Territory and the electorate containing Queanbeyan. From this latter electorate, we selected only those giving Queanbeyan as their residential address. To assist follow-up, participants were asked to provide the name, address, and phone numbers of two contacts (friends or relatives). Participants were sent a card, a PATH Newsletter and a 'change of address' card. Participants were asked to update the information on these cards and post them back or telephone or email with changes to their contact details. |
| Sacramento Area Latino Study on Aging ( <b>SALSA</b> )                    | California ADDTC criteria and NINDS-ADRDA                                                   | The SALSA Study was a longitudinal cohort study of 1,789 community-dwelling Mexican Americans residing in California's Sacramento Valley who were aged 60-101 years at baseline in 1998-1999. Participants were followed every 12-15 months via home visits that included clinical and cognitive assessments. A semi-annual phone call was made to obtain updates on medications, health events, and some sociodemographic risk factors.                                                                                                                                                                                                          |
| Sydney Memory and Ageing Study ( <b>Sydney MAS</b> )                      | DSM-IV                                                                                      | Non-demented community-dwelling individuals aged 70–90 were recruited from two areas of Sydney, following a random approach to 8914 individuals on the electoral roll.                                                                                                                                                                                                                                                                                                                                                                                                                                                                            |
| Taiwan Initiative for Geriatric Epidemiological Research ( <b>TIGER</b> ) | A history of dementia – self-report or medication use and MOCA-T ( $\leq 19$ ) <sup>d</sup> | Adults aged $\geq 65$ years who participated in the senior health checkup program at National Taiwan University Hospital during 2011–2013 were recruited.                                                                                                                                                                                                                                                                                                                                                                                                                                                                                         |
| Vallecas Project ( <b>Vallecas</b> )                                      | DSM-IV-TR (text-revised)                                                                    | Volunteers were recruited through radio and TV campaigns, leaflet distribution, and visits of the research team to social centers for the elderly. If a participant cannot attend a follow-up visit, he/she is invited to perform a medical interview by phone.                                                                                                                                                                                                                                                                                                                                                                                   |
| Zaragoza Dementia Depression Project ( <b>ZARADEMP</b> )                  | DSM-IV                                                                                      | Random sample from the census list in the city of Zaragoza (1991) of both, men and women aged 55 years or more, stratified by sex and age (5-year age categories). To minimize attrition, a proportion of the elderly were traced to their children's homes or to their temporary rural homes.                                                                                                                                                                                                                                                                                                                                                    |

<sup>a</sup> Participants with dementia at baseline were excluded from the analyses.

<sup>b</sup> For further details about each study, refer to the reference paper listed in Table 1.

<sup>c</sup> Dementia was not diagnosed in the study. The lowest 5th percentile (= cut-off point of 17) is used to determine dementia, as recommended for the use in Brazilian population-based studies of elderly with low schooling level [Castro-Costa 2008].

<sup>d</sup> MoCA-T = Montreal Cognitive Assessment-Taiwanese version. Dementia was not diagnosed in this study. There is no established cut-off for dementia for the MoCA-T and we excluded those in the lowest 5th percentile (= cut-off point of 19) which is a conservative estimate for suspected dementia, as a large survey in Taiwan reported age-gender-adjusted prevalence of 8.1% for all cause dementia in adults aged 65+ [Sun 2014].

#### References:

Castro-Costa E, Fuzikawa C, Uchoa E, Firmo JO, Lima-Costa MF. Norms for the mini-mental state examination: adjustment of the cut-off point in population-based studies. *Arq Neuropsiquiatr*. 2008;66:524-8. doi: 10.1590/s0004-282x2008000400016.  
Sun Y, Lee HJ, Yang SC, et al. A nationwide survey of mild cognitive impairment and dementia, including very mild dementia, in Taiwan. *PLoS One*. 2014;9(6):e100303. doi: 10.1371/journal.pone.0100303.

**eTable 2. Stroke Data From Each Study**

| <b>Study <sup>a</sup></b> | <b>Definition of incident stroke</b>                                                                                                                      | <b>Time of stroke (since study entry)</b>                                                              |
|---------------------------|-----------------------------------------------------------------------------------------------------------------------------------------------------------|--------------------------------------------------------------------------------------------------------|
| <b>EAS</b>                | Self-reported, occurred in the past year                                                                                                                  | Time in study for the wave (which recorded the stroke) minus 0.5                                       |
| <b>EPIDEMCA</b>           | Self-reported: Have you ever had an attack which requested medical attention? Or requiring hospitalization or consult due to stroke in the last 12 months | Time in study for the wave (which recorded the stroke) minus 0.5                                       |
| <b>Epifloripa</b>         | Self-reported: Has any doctor or health professional ever said that you have stroke                                                                       | Halfway between two waves                                                                              |
| <b>ESPRIT</b>             | Self-reported                                                                                                                                             | Time in study for the wave (which recorded the stroke) minus 1 year (for wave 4, minus 1.5)            |
| <b>H70 study</b>          | History of stroke, based on in-patient register and/or from examination                                                                                   | Year of stroke                                                                                         |
| <b>Invece.Ab</b>          | World Health Organization (WHO) definition of stroke or TIA used (Note, TIAs were not distinguished from stroke)                                          | Year and month of stroke                                                                               |
| <b>LEILA 75+</b>          | Self-reported                                                                                                                                             | Halfway between two waves                                                                              |
| <b>MYHAT</b>              | Self-reported                                                                                                                                             | Halfway between two waves                                                                              |
| <b>PATH</b>               | Self-reported (any stroke since the last assessment)                                                                                                      | Halfway between two waves or based the self-reported year which stroke occurred (1st June of the year) |
| <b>SALSA</b>              | Self-report or stroke listed as cause of death in death cert                                                                                              | Self-reported dates                                                                                    |
| <b>Sydney MAS</b>         | Self-reported diagnosis of a stroke in the last 2 years (for wave 5: in the past 12 months)                                                               | > 5 years ago, 1-2 years ago, 6-12 months ago, or 3-6 months ago                                       |
| <b>TIGER</b>              | Self-reported at wave 3 and 4 (information was not collected at wave 2)                                                                                   | Halfway between two waves                                                                              |
| <b>Vallecas</b>           | Self-reported                                                                                                                                             | Halfway between two waves                                                                              |
| <b>ZARADEMP</b>           | Self-reported (Has a doctor told you that you had a stroke?)                                                                                              | Halfway between two waves                                                                              |

<sup>a</sup> For full study names refer to eTable 1.

**eTable 3. Criteria for Harmonized Baseline Factors**

| <b>Baseline factor</b> | <b>Categories <sup>a</sup></b>                              | <b>Criteria (meeting any is sufficient)</b>                                                                                                                                                           |
|------------------------|-------------------------------------------------------------|-------------------------------------------------------------------------------------------------------------------------------------------------------------------------------------------------------|
| Diabetes               | Yes/no                                                      | Medical history, treatment, self-report, and/or fasting blood glucose $\geq 126$ mg/dL or $> 7$ mmol/L.                                                                                               |
| Hypertension           | Yes/no                                                      | Medical history, treatment, self-report, and/or seated systolic blood pressure $\geq 140$ mmHg or diastolic blood pressure $\geq 90$ mmHg.                                                            |
| High cholesterol       | Yes/no                                                      | Medical history, treatment, self-report, and/or total cholesterol $\geq 240$ mg/dL ( $> 6.2$ mmol/L), or triglycerides $\geq 200$ mg/dL ( $> 2.3$ mmol/L), or LDL $\geq 160$ mg/dL ( $> 4.1$ mmol/L). |
| Cardiovascular disease | Yes/no                                                      | Atrial fibrillation, coronary heart disease, angina, myocardial infraction, heart failure, and/or ischemic heart disease self-reported or in the medical history notes.                               |
| Depression             | Yes/no                                                      | Use of anti-depressants, self-reported depression, and/or depression based on a depression scale <sup>b</sup> and associated cut-off point as noted for individual study.                             |
| Smoking                | Never, past, current <sup>b</sup>                           | Self-reported.                                                                                                                                                                                        |
| Alcohol use            | No/minimal, 1 drink/week, $\geq 2$ drinks/week <sup>b</sup> | Based on estimated/self-reported number of drinks per week.                                                                                                                                           |
| Physical activity      | Minimal, moderate, vigorous <sup>b</sup>                    | Based on physical activity questionnaires <sup>b</sup> where different types of activities such as walking, gardening, swimming, etc. and time spent on the activities per week were recorded.        |

<sup>a</sup> Harmonized categories used in the present paper.

<sup>b</sup> For the key model in the statistical analysis, the 3 categories were collapsed into two (no/minimal vs the other categories) to allow convergence in the multiple imputation of the covariates.

**eTable 4. Harmonization of Baseline Vascular Risk Factors for Each Study**

| Study <sup>a</sup> | Criteria (meeting any is sufficient)            |                                                        |                                       |                                                                                                                                                               |                                                                                                                                                                     |                                                                                                                                              |
|--------------------|-------------------------------------------------|--------------------------------------------------------|---------------------------------------|---------------------------------------------------------------------------------------------------------------------------------------------------------------|---------------------------------------------------------------------------------------------------------------------------------------------------------------------|----------------------------------------------------------------------------------------------------------------------------------------------|
|                    | Diabetes                                        | Hypertension                                           | High cholesterol                      | Cardiovascular disease                                                                                                                                        | Alcohol use                                                                                                                                                         | Depression                                                                                                                                   |
| <b>EAS</b>         | Medical history                                 | Blood pressure (mean of 2), medical history            | Cholesterol, triglycerides            | Myocardial infarction, coronary artery bypass, angina, heart failure, angioplasty, or arrhythmia                                                              | Drinks per week calculated from use during past year for each of beer, wine, liquor                                                                                 | GDS score 6+                                                                                                                                 |
| <b>EPIDEMCA</b>    | Medical history, treatment, blood glucose       | Blood pressure (mean of 2), medical history, treatment | Cholesterol <sup>c</sup>              | NA                                                                                                                                                            | Number of alcohol unit in a 'normal' week                                                                                                                           | GMS-AGECAT rating of subcase or clinical case                                                                                                |
| <b>Epifloripa</b>  | Self-report, fasting blood glucose <sup>b</sup> | Blood pressure (mean of 2), self-report                | Cholesterol, triglycerides, LDL       | Self-report                                                                                                                                                   | According to the AUDIT Alcohol screening tool. Never=0; Moderate=1; High=2                                                                                          | Depression observed during neuropsychiatric exam                                                                                             |
| <b>ESPRIT</b>      | Treatment, fasting blood glucose                | Blood pressure (mean of 2), medication                 | Treatment, cholesterol, triglycerides | Ischemic heart disease (angina, history of angioplasty, heart operation or myocardial infarction), heartbeat disorders (arrhythmia or auricular fibrillation) | Drinks per week calculated from consumption in grams/day using 10 g = 1 drink                                                                                       | GDS score 6+; self-reported depression                                                                                                       |
| <b>H70 study</b>   | Self-report, medication                         | Self-reported with treatment, blood pressure           | Dyslipidemia <sup>d</sup>             | Myocardial infarction, angina, heart failure, or atrial fibrillation (self-report)                                                                            | Estimated total alcohol consumption per week in g/week.                                                                                                             | Major (according to DSM-V criteria) or minor (according to DSM-IV-TR criteria) depression; use of anti-depressants                           |
| <b>Invece.Ab</b>   | Treatment, medical history                      | Blood pressure, medication                             | Medical history, treatment            | Myocardial infarction, heart failure, angina, arrhythmia, coronary artery bypass graft, atrial fibrillation (medical history)                                 | Whether an individual drinks alcohol habitually, regardless of the amount. In Italy it is part of the normal diet to drink wine with meals. Data coded 0 or 1 only. | Use of anti-depressants; GDS score 6+; Criteria-based diagnosis by physician/ psychologist (including medication, GDS score and CES-D items) |



| Study <sup>a</sup> | Criteria (meeting any is sufficient)                  |                                                                                      |                                                           |                                                                                                                   |                                                                                                                                 |                                                                                   |
|--------------------|-------------------------------------------------------|--------------------------------------------------------------------------------------|-----------------------------------------------------------|-------------------------------------------------------------------------------------------------------------------|---------------------------------------------------------------------------------------------------------------------------------|-----------------------------------------------------------------------------------|
|                    | Diabetes                                              | Hypertension                                                                         | High cholesterol                                          | Cardiovascular disease                                                                                            | Alcohol use                                                                                                                     | Depression                                                                        |
| <b>LEILA 75+</b>   | Self-reported                                         | Blood pressure, medication                                                           | NA                                                        | Myocardial infarction (self-report)                                                                               | Number of drinks per week                                                                                                       | DSM-IV criteria based on structured clinical interview; CES-D score 16+           |
| <b>MYHAT</b>       | Self-reported                                         | Medical history, medication, blood pressure (average of measures from waves 1 and 2) | Self-reported                                             | Myocardial infarction, coronary heart failure                                                                     | Calculated based on questions "Have you ever had alcohol?", "How often do you drink?", "How many drinks do you have at a time?" | Use of anti-depressants; CES-D (modified) score $\geq 3$                          |
| <b>PATH</b>        | Medical history, treatment                            | Blood pressure (mean of 2), medication                                               | Treatment                                                 | "Do you have heart trouble?"                                                                                      | Drinks per week coded as monthly or less = 0, 2-4 times a month = 1, 2-3 times a week or more = 2                               | Goldberg Anxiety and Depression Scale depression score 6+; Anti-depressants taken |
| <b>SALSA</b>       | Self-report, fasting blood glucose, medication        | Blood pressure (mean of 2), medication                                               | Medication, cholesterol, triglycerides                    | Myocardial infarction, angina, congestive heart failure, atrial fibrillation, heart catheterization (self-report) | Number of drinks per week                                                                                                       | CES-D score 16+; Anti-depressants taken                                           |
| <b>Sydney MAS</b>  | Fasting blood glucose, treatment, medical history     | Blood pressure (mean of 2), self-report, medication                                  | Medical history, treatment, cholesterol, triglycerides    | Heart attack, angina, cardiomyopathy, valve disease, arrhythmia, atrial fibrillation (ever diagnosed)             | Coded as monthly or less = 0, 2-4 times a month = 1, 2-3 times a week or more = 2                                               | GDS score 6+; use of medication                                                   |
| <b>TIGER</b>       | Self-report, medication, fasting blood glucose        | Self-report, medication                                                              | Cholesterol, self-report (for hyperlipidemia), medication | Coronary heart disease, atrial fibrillation (self-report)                                                         | Never or ever                                                                                                                   | Self-report; Medication use; CES-D score $\geq 16$                                |
| <b>Vallecas</b>    | Fasting blood glucose, treatment (not including diet) | Self-report, medication                                                              | Self-report (high cholesterol or high triglycerides)      | Angina or myocardial infarction                                                                                   | Converted from grams of alcohol p/week* to drinks p/week (divide by 14g); $< 1 = 0$ ; $> 0$ and $< 2$ drink = 1; 2 or more = 2  | Diagnosed by a physician (including medication and treatment); GDS score 6+       |

| Study <sup>a</sup> | Criteria (meeting any is sufficient) |                                        |                            |                                                                                                       |             |                                               |
|--------------------|--------------------------------------|----------------------------------------|----------------------------|-------------------------------------------------------------------------------------------------------|-------------|-----------------------------------------------|
|                    | Diabetes                             | Hypertension                           | High cholesterol           | Cardiovascular disease                                                                                | Alcohol use | Depression                                    |
| ZARADEMP           | Medical history, treatment           | Blood pressure (mean of 2), medication | Self-report (dyslipidemia) | Myocardial infarction, angina (diagnosed using EURODEM Risk Factor Questionnaire and medical records) | Yes or no   | GMS-AGECAT rating of subcase or clinical case |

All medical history data were collected at baseline unless specified.

Abbreviations: NA=not available. CES-D, Centre for Epidemiological Studies depression scale. CIRS, Cumulative Illness Rating Scale. DSM-IV, Diagnostic and Statistical Manual of Mental Disorders (4th edition). GDS, Geriatric Depression Scale. GMS-AGECAT, Geriatric Mental State-Automated Geriatric Examination for Computer Assisted Taxonomy. ICD-10, International Classification of Diseases (10th revision) MINI, Mini International Neuropsychiatric Interview, NPI, Neuropsychiatric Inventory.

<sup>a</sup> For full study names refer to eTable 1.

<sup>b</sup> High cholesterol was defined as (>5.3mmol/L) for EPIDEMCA.

<sup>c</sup> Collected at the second wave but not at baseline.

<sup>d</sup> For the H70 study, the definition of dyslipidemia was total cholesterol/HDL  $\geq 5$  or LDL  $\geq 3.5$  or on lipid lowering drugs.

**eTable 4. Harmonization and Definition of Baseline Vascular Risk Factors (continued from previous table)**

| <b>Study</b> | <b>Physical activity<br/>Minimally active = 0; Moderate activity at least once per week = 1; Vigorous activity at least once per week = 2</b>                                                                                                                                                                                                                                                                                                                         |
|--------------|-----------------------------------------------------------------------------------------------------------------------------------------------------------------------------------------------------------------------------------------------------------------------------------------------------------------------------------------------------------------------------------------------------------------------------------------------------------------------|
| EAS          | Light activities (walking, gardening, dancing, calisthenics, golf, bowling, horse riding) at least 1 day a week = 1, Medium (hiking, tennis, cycling, swimming) or heavy (jogging, aerobics, hand, or racquet ball) activities at least 1 day a week=2, 0 (or less) days for all categories=0                                                                                                                                                                         |
| EPIDEMCA     | Current physical activity was estimated using a threshold of at least 150 minutes of walking or cycling in the past week (World Health Organization 1984).                                                                                                                                                                                                                                                                                                            |
| EpiFloripa   | The physical activity score was measured using the long version of the International Physical Activity Questionnaire, adapted, and validated for the older adults in Brazil. The recreation and transportation domains were used. 1 ≥ 150 min/week, 0 ≤ 150 min/week. <sup>a</sup>                                                                                                                                                                                    |
| ESPRIT       | Either of gardening or walking “a little” or “a lot” = 1 vs “very little” = 0, Sports “regularly” or “often” = 2, gardening or walking “very little” and sports “never” or “from time to time” = 0                                                                                                                                                                                                                                                                    |
| H70 study    | 0 = “almost nothing” or “mostly sedentary, walking sometimes/easy gardening/light household work”. 1 = walks at least once per week; “Light physical activity, 2-4 h/w e.g. walks, fishing, dancing” or “Moderate physical activity, 1-2 h/w e.g. exercise, swimming, gymnastics, all household work”. 2 = “Moderate physical activity, at least 3 times/w e.g. tennis, swimming, exercising, running” or “Intense physical activity, regularly several times/w”      |
| Invece.Ab    | Response options are “never”, “1 x week”, “2 x week”, “3+ week”. Any of walking > 30 mins, dancing, “others”, group exercise “1 x week” or more = 1. Any of cycling, swimming, running-jogging, tennis, aerobics “1 x week” or more = 2. None of these or only walking < 30 mins = 0.                                                                                                                                                                                 |
| LEILA75+     | NA                                                                                                                                                                                                                                                                                                                                                                                                                                                                    |
| MYHAT        | Classed as bivariate                                                                                                                                                                                                                                                                                                                                                                                                                                                  |
| PATH         | Moderate activity (scrubbing, polishing car, dancing, golf, cycling, decorating, lawn mowing, leisurely swimming) “once or twice a week” or “3 times a week or more” = 1. Vigorous activity (running, hard swimming, tennis, squash, digging, cycle racing) “once or twice a week” “3 times a week or more” = 2. Less frequent participation in these, only mild activity (walking, woodwork, gardening, bike repairs, playing pool, general housework), or less = 0. |
| SALSA        | 1 hour or more of swim or work out = 2; doing yard work, taking walks, doing heavy housework, dancing, hunting or camping or boating, golf or other moderate exercise, walking around your neighborhood, or climbing at least 5 flights of stairs per day <sup>b</sup> = 1; doing house repairs, baking, doing light housework, cook meals, standing or walking at work or home, sitting at work or home, driving a car.                                              |
| Sydney MAS   | Any time indicated for separate activities bowls, golf, dancing, walking, other (Pilates, yoga, tai chi, weights)=1. Any time indicated for tennis, swimming, jogging, bicycling, aerobics, other relevant=2. Cases with no time indicated or where the time is clearly less than once a week=0.                                                                                                                                                                      |
| TIGER        | A short version of International Physical Activity Questionnaire (IPAQ) <sup>c</sup> was used to measure physical activity in MET minutes per week. ≥ 1500 MET-min/week = 2; ≥ 600 and < 1500 MET-min/week = 1; < 600 MET-min/week = 0.                                                                                                                                                                                                                               |
| Vallecas     | NA                                                                                                                                                                                                                                                                                                                                                                                                                                                                    |
| ZARADEMP     | NA                                                                                                                                                                                                                                                                                                                                                                                                                                                                    |

Note. All information provided by the investigator or data manager of each study. NA=not available. <sup>a</sup> Ono LM, Schneider IJ, Confortin SC, d'Orsi E. Paid Work and Physical Activity Preserve Functional Capacity in Elderly People: EpiFloripa Study. *Gerontol Geriatr Med.* 2015;1:2333721415608022. <sup>b</sup> In total energy expenditure, 5 flights of stairs per day was calculated as approximately equal to one 30-min walk a week: walking 1 block (0.13 km) daily = 235 kJ/week; climbing up and down 1 flight of stairs daily = 118 kJ/week; and assuming a moderate walking pace of 4.8 km/h. Lee IM, Paffenbarger RS, Jr. Associations of light, moderate, and vigorous intensity physical activity with longevity. *The Harvard Alumni Health Study.* *Am J Epidemiol* 2000;151:293-9. <sup>c</sup> International Physical Activity Questionnaire. IPAQ scoring protocol. <https://sites.google.com/view/ipaq/score> [accessed 28th February 2024]

**eTable 5. Missing Data for Each Variable**

| <b>Baseline factor</b>           | <b>Available data</b> | <b>Missing data, %</b> |
|----------------------------------|-----------------------|------------------------|
| Age at baseline                  | 20860                 | 0                      |
| Study entry period               | 20860                 | 0                      |
| sex                              | 20860                 | 0                      |
| Education                        | 20860                 | 0                      |
| Ethno-racial groups              | 20860                 | 0                      |
| BMI                              | 18201                 | 0                      |
| APOE ε4 carrier                  | 13096                 | 37.2%                  |
| Blood pressure                   | 18904                 | 9.4%                   |
| Diabetes                         | 20735                 | 0.6%                   |
| Hypertension                     | 20746                 | 0.5%                   |
| High cholesterol                 | 17910                 | 14.1%                  |
| Cardiovascular disease           | 19779                 | 5.2%                   |
| Smoker (ever)                    | 20771                 | 0.4%                   |
| Alcohol use                      | 19675                 | 5.7%                   |
| Physical activity                | 13009                 | 37.6%                  |
| Depression                       | 19755                 | 5.3%                   |
| <b>Baseline cognitive scores</b> |                       |                        |
| MMSE                             | 19829                 | 4.9%                   |
| Global cognition                 | 8483                  | 59.3%                  |
| Processing speed                 | 8554                  | 59.0%                  |
| Memory                           | 19163                 | 8.1%                   |
| Language                         | 10458                 | 49.9%                  |
| Executive function               | 7815                  | 62.5%                  |

**eTable 6. Neuropsychological Tests Used in Each Study for Each Cognitive Domain**

| <b>Study <sup>a</sup></b> | <b>Memory</b>                                             | <b>Language</b>                                                    | <b>Processing Speed</b>   | <b>Executive Function</b> | <b>Mini-Mental State Examination (MMSE)</b> | <b>Global Cognition <sup>b</sup></b> |
|---------------------------|-----------------------------------------------------------|--------------------------------------------------------------------|---------------------------|---------------------------|---------------------------------------------|--------------------------------------|
| <b>EAS</b>                | Free and Cued Selective Reminding Test                    | Animals in 60s                                                     | TMTA                      | TMTB                      | Converted from Blessed                      | Yes                                  |
| <b>EPIDEMCA</b>           | Free and Cued Selective Reminding Test                    | Animals/ fruits in 60s                                             | Zazzo's Cancellation Task | NA                        | NA                                          | NA                                   |
| <b>EpiFloripa</b>         | NA                                                        | NA                                                                 | NA                        | NA                        | Yes                                         | NA                                   |
| <b>ESPRIT</b>             | 5-word test                                               | Animals in 30s                                                     | TMTA                      | TMTB                      | Yes                                         | Yes                                  |
| <b>H70 study</b>          | Memory in Reality test (3 waves only)                     | Animals                                                            | NA                        | NA                        | Yes                                         | NA                                   |
| <b>Invece.Ab</b>          | Rey Auditory Verbal Learning Test, trial 7 (delay=15 min) | Verbal fluency, mean of colors/ animals/ fruits/ cities, each 120s | TMTA                      | TMTB                      | Yes                                         | Yes                                  |
| <b>LEILA75+</b>           | SIDAM word list                                           | NA                                                                 | NA                        | NA                        | Yes                                         | NA                                   |
| <b>MYHAT</b>              | FULD                                                      | Animals                                                            | TMTA                      | TMTB                      | Yes                                         | Yes                                  |
| <b>PATH</b>               | Delayed recall (wave 4 was not included <sup>c</sup> )    | NA                                                                 | TMTA (baseline NA)        | TMTB (baseline NA)        | Yes                                         | Yes (baseline and wave 4 NA)         |
| <b>SALSA</b>              | Word list                                                 | NA                                                                 | NA                        | NA                        | Yes                                         | NA                                   |
| <b>Sydney MAS</b>         | RAVLT                                                     | Animals in 60s                                                     | TMTA                      | TMTB                      | Yes                                         | Yes                                  |
| <b>TIGER</b>              | Delayed free recall                                       | Verbal fluency, mean of (fruits/fish/ vegetables                   | TMTA                      | TMTB                      | NA                                          | Yes                                  |
| <b>Vallecas</b>           | Delayed free recall                                       | Animals                                                            | NA                        | NA                        | Yes                                         | NA                                   |
| <b>ZARADEMP</b>           | MMSE – word list                                          | NA                                                                 | NA                        | NA                        | Yes                                         | NA                                   |

Abbreviations: NA=not available. TMTA=Trail Making Test A; TMTB=Trail Making Test B.

<sup>a</sup> For full study names refer to eTable 1.

<sup>b</sup> Global cognition was calculated as the average of at least 3 domains.

<sup>c</sup> Delayed recalled scores from wave 4 were not included since a different version of the test was used.

**eTable 7. Interpretation of Model Coefficients**

| <b>Analysis using:</b>         | <b>Model interpretation of coefficient (condition)</b> | <b>Clinical interpretation</b>                                                                  |
|--------------------------------|--------------------------------------------------------|-------------------------------------------------------------------------------------------------|
| <b>1) All participants</b>     |                                                        |                                                                                                 |
| TIS                            | Slope (stroke=0 for all participants)                  | Rate of decline (SD/y) without a previous stroke in all participants (“stroke-free trajectory”) |
| TSS                            | Difference in slope in relation to TIS (stroke=1)      | Long-term effect of stroke on cognitive decline                                                 |
| Stroke                         | Difference in intercepts between two functions (TSS=0) | Acute effect of stroke on level of cognition                                                    |
| <b>2) Stroke group only</b>    |                                                        |                                                                                                 |
| TIS                            | Slope before stroke (stroke=0)                         | Rate of decline (SD/y) before a stroke event (“pre-stroke trajectory”)                          |
| TSS                            | Difference in slope after stroke (stroke=1)            | Long-term effect of stroke on cognitive decline (change in slope post-stroke)                   |
| Stroke                         | Difference in intercepts between two functions (TSS=0) | Acute effect of stroke on level of cognition (acute change post-stroke)                         |
| <b>3) No-stroke group only</b> |                                                        |                                                                                                 |
| TIS                            | Slope for no-stroke group only                         | Rate of decline in participants without stroke over follow up                                   |
| TSS                            | Not included                                           | NA                                                                                              |
| Stroke                         | Not included                                           | NA                                                                                              |

**eTable 8. Participant Baseline Characteristics by Study**

| <b>Study <sup>a</sup></b> | <b>N</b> | <b>Age (years)</b>             | <b>Male</b> | <b>Education (years)</b> |
|---------------------------|----------|--------------------------------|-------------|--------------------------|
| <b>EAS</b>                | 1,915    | 78.1 (5.3)                     | 37%         | 13.2 (3.6)               |
| <b>EPIDEMCA</b>           | 448      | 74.1 (7.1)                     | 37%         | 2.21 (4.1)               |
| <b>EpiFloripa</b>         | 1,054    | 69.2 (7.0)                     | 34%         | 8.2 (5.8)                |
| <b>ESPRIT</b>             | 2,098    | 73.0 (5.5)                     | 41%         | 10.2 (3.8)               |
| <b>H70 study</b>          | 550      | 70.2 (1.0)                     | 41%         | 10.2 (4.4)               |
| <b>Invece.Ab</b>          | 1,082    | 72.1 (1.3)                     | 46%         | 7.1 (3.3)                |
| <b>LEILA75+</b>           | 878      | 81.5 (4.8)                     | 25%         | 11.9 (1.8)               |
| <b>MYHAT</b>              | 1,808    | 77.5 (7.4)                     | 39%         | 12.9 (2.4)               |
| <b>PATH</b>               | 2,420    | 62.5 (1.5)                     | 52%         | 13.8 (2.8)               |
| <b>SALSA</b>              | 1,565    | 70.2 (6.8)                     | 41%         | 7.3 (5.4)                |
| <b>Sydney MAS</b>         | 996      | 78.9 (4.8)                     | 47%         | 11.6 (3.5)               |
| <b>TIGER</b>              | 566      | 72.9 (5.4)                     | 37%         | 13.6 (3.7)               |
| <b>Vallecas</b>           | 1,103    | 74.9 (3.9)                     | 36%         | 10.3 (5.8)               |
| <b>ZARADEMP</b>           | 4,377    | 73.2 (9.5)                     | 43%         | 7.2 (3.9)                |
| <b>TOTAL</b>              | 20,980   | 72.9 (8.0)<br>Range = 58 – 103 | 43%         | 10.0 (4.9)               |

Note. Figures represent mean (SD) or n (%). A representative from each study has checked their study data reported in this table.

<sup>a</sup> For full study names refer to eTable 1.

**eTable 9. Participant Medical History at Baseline Assessment by Study**

| Study <sup>a</sup> | N <sup>b</sup> | APOE4 carrier <sup>c</sup> | BMI        | Systolic BP | Hypertension <sup>d</sup> | Diabetes <sup>d</sup> | High Cholesterol <sup>d</sup> | CVD <sup>d</sup> | Smoking (ever) <sup>e</sup> | Alcohol <sup>f</sup> | Physically active <sup>g</sup> | Depression <sup>d</sup> |
|--------------------|----------------|----------------------------|------------|-------------|---------------------------|-----------------------|-------------------------------|------------------|-----------------------------|----------------------|--------------------------------|-------------------------|
| EAS                | 1,915          | 213/968 (22%)              | 28.3 (5.3) | 134 (16)    | 1165/1861 (63%)           | 322/1870 (17%)        | 95/586 (16%)                  | 613/1878 (33%)   | 1024/1877 (55%)             | 648/1353 (48%)       | 472/766 (62%)                  | 180/1570 (11%)          |
| EPIDEMCA           | 448            | 126/304 (41%)              | 21.6 (5.1) | 146 (30)    | 323/448 (72%)             | 48/441 (11%)          | 50/367 (14%)                  | NA               | 77/448 (17%)                | 72/442 (16%)         | 240/447 (54%)                  | 14/125 (11%)            |
| EpiFloripa         | 1,054          | NA                         | 28.2 (5.0) | 141 (21)    | 808/1054 (77%)            | 642/1054 (61%)        | 118/542 (22%)                 | 274/1054 (26%)   | 399/1054 (38%)              | 400/1054 (38%)       | 534/504 (51%)                  | 157/1032 (15%)          |
| ESPRIT             | 2,098          | 391/2059 (19%)             | 25.1 (3.7) | 141 (17)    | 1499/2098 (71%)           | 193/2098 (9%)         | 1187/2098 (57%)               | 411/2098 (20%)   | 865/2097 (41%)              | 1551/2061 (75%)      | 1566/1866 (84%)                | 633/2089 (30%)          |
| H70 study          | 550            | 155/539 (29%)              | 27.0 (4.2) | 155 (22)    | 453/550 (82%)             | 51/524 (10%)          | 380/546 (70%)                 | 86/550 (16%)     | 282/519 (54%)               | 119/518 (23%)        | 448/450 (~100%)                | 95/550 (17%)            |
| Invece.Ab          | 1,082          | 195/1081 (18%)             | 27.1 (4.6) | 142 (18)    | 641/1082 (59%)            | 179/1081 (17%)        | 352/1081 (33%)                | 288/1081 (27%)   | 453/1082 (42%)              | 687/1081 (64%)       | 742/1082 (69%)                 | 166/1082 (15%)          |
| LEILA75+           | 878            | 38/230 (17%)               | NA         | 159 (24)    | 660/822 (80%)             | 194/878 (22%)         | NA                            | 74/878 (8%)      | 278/873 (32%)               | 768/874 (88%)        | NA                             | 291/878 (33%)           |
| MYHAT              | 1,808          | 344/1643 (21%)             | 28.0 (5.5) | 133 (15)    | 1485/1808 (82%)           | 387/1806 (21%)        | 1091/1800 (61%)               | 350/1803 (19%)   | 957/1804 (53%)              | 478/1808 (26%)       | 1543/1806 (85%)                | 384/1804 (21%)          |
| PATH               | 2,420          | 615/2263 (27%)             | 26.9 (5.3) | 140 (19)    | 1582/2418 (65%)           | 177/2418 (7%)         | 535/2419 (22%)                | 338/2414 (14%)   | 1153/2418 (48%)             | 1696/2417 (70%)      | 1637/2411 (68%)                | 217/2419 (9%)           |
| SALSA              | 1,565          | 193/1417 (14%)             | 29.8 (6.0) | 138 (19)    | 1033/1565 (66%)           | 484/1565 (31%)        | 726/1436 (51%)                | 315/1547 (20%)   | 838/1565 (54%)              | 363/1561 (23%)       | 1382/1565 (88%)                | 439/1555 (28%)          |
| Sydney MAS         | 996            | 214/926 (23%)              | 27.1 (4.5) | 145 (21)    | 824/996 (83%)             | 153/996 (15%)         | 675/996 (68%)                 | 288/996 (29%)    | 533/994 (54%)               | 611/996 (61%)        | 812/996 (82%)                  | 144/996 (14%)           |
| TIGER              | 566            | 89/563 (16%)               | 23.9 (2.9) | 127 (15)    | 346/566 (61%)             | 90/566 (16%)          | 274/566 (48%)                 | 133/565 (24%)    | 91/566 (16%)                | 116/566 (20%)        | 467/566 (83%)                  | 55/566 (10%)            |
| Vallecas           | 1,103          | 186/1103                   | 27.3 (3.6) | 143 (21)    | 577/1102 (52%)            | 127/1102 (12%)        | 588/1096 (54%)                | 59/1097 (5%)     | 424/1102 (38%)              | 96/576 (17%)         | NA                             | 371/1102 (34%)          |
| ZARADEMP           | 4,377          | NA                         | 27.0 (5.0) | 141 (19)    | 2977/4376 (68%)           | 542/4336 (13%)        | 245/4377 (6%)                 | 295/4368 (7%)    | 1512/4372 (35%)             | 1144/4368 (26%)      | NA                             | 764/3987 (19%)          |

Note. Figures represent mean (SD) or n (%). A representative from each study has checked their study data reported in this table. <sup>a</sup> For full study names refer to eTable 1. <sup>b</sup> Sample size for the present project which included participants with baseline assessment who were stroke free and without a dementia diagnosis. <sup>c</sup> APOE4 carrier = at least 1 APOE 4 allele. <sup>d</sup> Hypertension/diabetes/high cholesterol/CVD/depression = identified at baseline or has a history of said condition. <sup>e</sup> Smoking = ever smoked (past or current). <sup>f</sup> Alcohol = ≥ 1 drink per week. <sup>g</sup> Physical activity = moderate or vigorous activity at least once per week.



**eTable 10. Baseline Characteristics of Participants Followed up Until the Last Assessment Versus Participants Who Dropped Out**

| Characteristics              | Followed up<br>(n=8573) | Dropped out<br>(n=12287) | p-value | Cohen's d/<br>Cohen's h <sup>a</sup> |
|------------------------------|-------------------------|--------------------------|---------|--------------------------------------|
| Age                          | 69.5 (6.9)              | 75.3 (7.8)               | <0.001  | 0.79                                 |
| Female                       | 4893 (57%)              | 7368 (60%)               | <0.001  | 0.06                                 |
| Education (in years)         | 10.3 (4.8)              | 9.9 (4.9)                | <0.001  | 0.08                                 |
| APOE4 carrier                | 1148 (21%)              | 1611 (21%)               | 0.62    | 0                                    |
| BMI                          | 27.1 (4.9)              | 26.9 (5.2)               | 0.095   | 0.02                                 |
| Systolic blood pressure      | 139.6 (19.1)            | 142.0 (20.8)             | <0.001  | 0.12                                 |
| Hypertension                 | 5762 (67%)              | 8611 (71%)               | <0.001  | 0.087                                |
| Diabetes                     | 1340 (16%)              | 2249 (18%)               | <0.001  | 0.053                                |
| High cholesterol             | 2662 (32%)              | 3653 (38%)               | <0.001  | 0.13                                 |
| CVD                          | 1226 (15%)              | 2212 (19%)               | <0.001  | 0.11                                 |
| Smoking (ever)               | 3479 (41%)              | 5407 (44%)               | <0.001  | 0.071                                |
| Alcohol                      |                         |                          |         |                                      |
| < 1 drink/week               | 4458 (53%)              | 6468 (58%)               | <0.001  | 0.10                                 |
| ≥ 1 drink/week               | 1786 (21%)              | 1413 (13%)               |         | 0.21                                 |
| ≥ 2 drinks/week              | 2236 (26%)              | 3314 (30%)               |         | 0.089                                |
| Physically active            |                         |                          |         |                                      |
| Minimally active             | 1390 (23%)              | 1774 (25%)               | <0.001  | 0.047                                |
| Moderately active            | 3027 (51%)              | 3996 (57%)               |         | 0.12                                 |
| Vigorous active              | 1524 (26%)              | 1298 (18%)               |         | 0.19                                 |
| Depression                   | 1259 (15%)              | 2651 (23%)               | <0.001  | 0.20                                 |
| Baseline cognition, z-scores |                         |                          |         |                                      |
| MMSE                         | 0.24 (1.09)             | -0.15 (1.16)             | <0.001  | 0.35                                 |
| Global cognition             | 0.38 (0.99)             | -0.07 (1.02)             | <0.001  | 0.45                                 |
| Processing speed             | 0.31 (1.06)             | -0.034 (1.11)            | <0.001  | 0.32                                 |
| Memory                       | 0.14 (1.03)             | -0.22 (1.09)             | <0.001  | 0.21                                 |
| Language                     | 0.16 (1.06)             | -0.064 (1.07)            | <0.001  | 0.21                                 |
| Executive function           | 0.43 (1.06)             | 0.013 (1.14)             | <0.001  | 0.38                                 |

Note. Figures are presented as n (%) or mean (SD).

<sup>a</sup> For both Cohen's d and Cohen's h, values of 0.2, 0.5 and 0.8 are taken to represent small, medium, and large differences between groups in means or proportions.

**eTable 11. Examination of Demographic and Vascular Risk Factor Individually in the Unadjusted Model**

| <b>Characteristics (n)</b>              | <b>Effect size (95% CI)</b> | <b>p-value</b>   |
|-----------------------------------------|-----------------------------|------------------|
| Sex (10814)                             | -0.12 (-0.16, -0.080)       | <b>&lt;0.001</b> |
| Age (at baseline; 10814)                | -0.066 (-0.070, -0.063)     | <b>&lt;0.001</b> |
| Education level, in years (10814)       | 0.086 (0.080, 0.091)        | <b>&lt;0.001</b> |
| Ethno-racial group (10814)              | (reference)                 |                  |
| White participants                      |                             |                  |
| Black (American) participants           | -0.50 (-0.60, -0.41)        | <b>&lt;0.001</b> |
| Asian (90% Chinese) participants        | -0.28 (-0.53, -0.041)       | <b>0.022</b>     |
| African participants                    | -0.20 (-0.87, 0.48)         | 0.57             |
| Hispanic (American) participants        | -0.093 (-0.30, 0.11)        | 0.38             |
| Other                                   | -0.85 (-1.12, -0.58)        | <b>&lt;0.001</b> |
| Study entry period (10814) <sup>a</sup> | (reference)                 |                  |
| 1990 – 1999                             |                             |                  |
| 2000 – 2009                             | 0.30 (0.19, 0.41)           | <b>&lt;0.001</b> |
| After 2010                              | 0.59 (0.43, 0.74)           | <b>&lt;0.001</b> |
| <b>Vascular risk factors</b>            |                             |                  |
| BMI (9318)                              | 0.0034 (-0.0009, 0.0077)    | 0.12             |
| APOE ε4 carrier (9425)                  | -0.047 (-0.093, -0.0015)    | <b>0.043</b>     |
| Blood pressure                          |                             |                  |
| Systolic (9547)                         | -0.0029 (-0.0040, -0.0018)  | <b>&lt;0.001</b> |
| Diastolic (9547)                        | 0.0016 (-0.00042, 0.0036)   | 0.12             |
| Hypertension (10771)                    | -0.14 (-0.18, -0.10)        | <b>&lt;0.001</b> |
| Diabetes (10772)                        | -0.23 (-0.29, -0.17)        | <b>&lt;0.001</b> |
| High cholesterol (9478)                 | 0.047 (0.0031, 0.090)       | <b>0.036</b>     |
| Cardiovascular disease (10358)          | -0.12 (-0.17, -0.073)       | <b>&lt;0.001</b> |
| Ever smoker (10783)                     | 0.024 (-0.015, 0.063)       | 0.23             |
| Alcohol use (10242) <sup>a</sup>        | (reference)                 |                  |
| Nil/minimal                             |                             |                  |
| ≥ 1 drink/week                          | 0.11 (0.045, 0.17)          | <b>0.001</b>     |
| ≥ 2 drink/week                          | 0.18 (0.13, 0.23)           | <b>&lt;0.001</b> |
| Physical activity (9505) <sup>a</sup>   | (reference)                 |                  |
| Minimal                                 |                             |                  |
| Moderate                                | 0.11 (0.055, 0.16)          | <b>&lt;0.001</b> |
| Vigorous                                | 0.22 (0.16, 0.28)           | <b>&lt;0.001</b> |
| Depression (10216)                      | -0.29 (-0.34, -0.24)        | <b>&lt;0.001</b> |

Note. n = participants with available data for global cognition. All characteristics represent measurements at study baseline or a medical history. Bold p-values indicate significance at the 0.1 level and the associated factor was chosen to be included in the adjusted model. The unadjusted model included time in study (TIS), stroke, and time since stroke (TSS).

<sup>a</sup>The three categories in each of these factors were separately collapsed into two for the adjusted model to allow convergence in the multiple imputation of the covariates (after 2000 vs before; ≥1 drink/week vs <1 drink/week; moderate and vigorous activity vs minimal).

**eTable 12. Missing Data on Covariates Included in the Adjusted Model**

|                         | <b>Complete data</b> | <b>Imputed data</b> |
|-------------------------|----------------------|---------------------|
| Diabetes                | 20735                | 125 (0.60%)         |
| Hypertension            | 20746                | 114 (0.55%)         |
| Depression              | 19755                | 1105 (5.3%)         |
| Alcohol                 | 19675                | 1185 (5.7%)         |
| CVD                     | 19779                | 1081 (5.2%)         |
| Systolic blood pressure | 18904                | 1956 (9.4%)         |
| High cholesterol        | 17910                | 2950 (14%)          |
| APOE4                   | 13096                | 7764 (37%)          |
| Physical activity       | 13009                | 7851 (38%)          |

**eTable 13. Unadjusted Estimates of Cognitive Changes in Global Cognition**

| Measure (model variable <sup>a</sup> )                      | All participants (n=10,814) <sup>b</sup> | Stroke only (n=388)             | No stroke only (n=10,426)       |
|-------------------------------------------------------------|------------------------------------------|---------------------------------|---------------------------------|
|                                                             | Coefficient (95% CI); p-value            | Coefficient (95% CI); p-value   | Coefficient (95% CI); p-value   |
| Slope without incident stroke (TIS; SD/y)                   | -0.048 (-0.050, -0.046); <0.001          | -0.043 (-0.059, -0.028); <0.001 | -0.043 (-0.045, -0.041); <0.001 |
| Acute effect of stroke on cognitive level (stroke; SD)      | -0.27 (-0.35, -0.19); <0.001             | -0.28 (-0.39, -0.18); <0.001    | NA                              |
| Difference in post-stroke slope relative to TIS (TSS; SD/y) | -0.039 (-0.058, -0.019); <0.001          | -0.031 (-0.055, -0.0062); 0.014 | NA                              |

<sup>a</sup> Additional interpretation of model coefficient: TIS (time in study) = rate of decline over stroke-free trajectory; stroke = difference in intercepts between stroke-free and post-stroke trajectories when TSS (time since stroke) = 0; TSS = effect of stroke on rate of decline.

<sup>b</sup> All participants (with global cognition data) were included in the estimate of the slope without a previous stroke; post-stroke decline was estimated in those with an incident stroke (n=388).

<sup>c</sup> The stroke variable from the model estimated the difference in intercepts between two functions at the time of stroke and can be interpreted as acute or short-term change in the level of cognition after stroke.

**eTable 14. Mean Values of Covariates Included the Adjusted Model**

| <b>Covariates</b>                                                           | <b>Mean value<sup>a</sup></b> |
|-----------------------------------------------------------------------------|-------------------------------|
| Age at baseline (years)                                                     | 75.5                          |
| Male sex (%)                                                                | 41%                           |
| Education (years)                                                           | 11.1                          |
| Ethno-racial groups (%) <sup>b</sup>                                        |                               |
| White participants                                                          | 81% <sup>b</sup>              |
| Black (American) participants                                               | 6.3%                          |
| Asian (90% Chinese) participants                                            | 6.7%                          |
| African participants                                                        | 4.1%                          |
| Hispanic (American) participants                                            | 1.2%                          |
| Other                                                                       | 0.3%                          |
| Study entry period – 2000s and 2010s (%)                                    | 71%                           |
| Diabetes (%)                                                                | 15%                           |
| Hypertension (%)                                                            | 71%                           |
| CVD (%)                                                                     | 25%                           |
| High cholesterol (%)                                                        | 50%                           |
| Systolic blood pressure (mmHg)                                              | 138                           |
| APOE4 allele carrier (%)                                                    | 21%                           |
| Depressive symptoms (%)                                                     | 19%                           |
| Physical activity – moderate and vigorous activity at least once a week (%) | 78%                           |
| Alcohol use – 1 or more drinks per week (%)                                 | 51%                           |

<sup>a</sup> Mean values of the subsample with global cognition data at baseline.

<sup>b</sup> For simplicity, we estimated predicted cognition scores based on someone who was White.

**eTable 15. Examination of Difference in Cognitive Trajectories Before Stroke Compared With Cognitive Trajectories in Those Without Stroke**

| Measure                           | Coefficient (95% CI)    | p-value |
|-----------------------------------|-------------------------|---------|
| <b>Global cognition</b> (n=10814) |                         |         |
| TIS <sup>a</sup> x group status   | 0.0080 (-0.0067, 0.023) | 0.29    |
| Group status <sup>b</sup>         | -0.0035 (-0.10, 0.097)  | 0.95    |
| <b>Memory</b> (n=19322)           |                         |         |
| TIS <sup>a</sup> x group status   | -0.010 (-0.026, 0.0057) | 0.21    |
| Group status <sup>b</sup>         | -0.019 (-0.088, 0.050)  | 0.59    |
| <b>Language</b> (n=10453)         |                         |         |
| TIS <sup>a</sup> x group status   | 0.013 (-0.0028, 0.028)  | 0.096   |
| Group status <sup>b</sup>         | -0.023 (-0.12, 0.069)   | 0.62    |
| <b>Processing speed</b> (n=10824) |                         |         |
| TIS <sup>a</sup> x group status   | 0.0064 (-0.011, 0.024)  | 0.48    |
| Group status <sup>b</sup>         | 0.060 (-0.050, 0.17)    | 0.29    |
| <b>Executive function</b>         |                         |         |
| TIS <sup>a</sup> x group status   | 0.015 (-0.0034, 0.033)  | 0.11    |
| Group status <sup>b</sup>         | -0.043 (-0.16, 0.072)   | 0.46    |
| <b>MMSE</b> (n=19835)             |                         |         |
| TIS <sup>a</sup> x group status   | 0.0080 (-0.0071, 0.023) | 0.30    |
| Group status <sup>b</sup>         | 0.017 (-0.046, 0.081)   | 0.60    |

The analysis was restricted to the period without a previous stroke for all participants. The model adjusted for baseline age, sex, education, ethno-racial group, study entry period, diabetes, hypertension, CVD, high cholesterol, systolic blood pressure, APOE4, depression, physical activity, and alcohol use. MI was used to impute missing covariates.

<sup>a</sup> TIS=time in study and represents the rate of change in cognition over the period without a previous stroke.

<sup>b</sup> The Group status variable represents difference in the level of cognition between the two groups.

**eTable 16. Sensitivity Analyses**

**1) complete data only; 2) restrict time since stroke (TSS) to  $\geq 1$  year; 3) exclude studies with  $> 50\%$  loss to follow-up**

| <b>Measure (model variable)<sup>a</sup></b>                 | <b>Sensitivity analysis 1<sup>b</sup></b><br>N=8,076 (7 studies) | <b>Sensitivity analysis 2</b><br>N=10,812 (8 studies) | <b>Sensitivity analysis 3<sup>c</sup></b><br>N=6,478 (5 studies) |
|-------------------------------------------------------------|------------------------------------------------------------------|-------------------------------------------------------|------------------------------------------------------------------|
|                                                             | <b>Coefficient (95% CI); p-value</b>                             | <b>Coefficient (95% CI); p-value</b>                  | <b>Coefficient (95% CI); p-value</b>                             |
| Slope without incident stroke (TIS; SD/y)                   | -0.050 (-0.052, -0.048); <0.001                                  | -0.049 (-0.051, -0.047); <0.001                       | -0.046 (-0.048, -0.043); <0.001                                  |
| Acute effect of stroke on cognitive level (stroke; SD)      | -0.31 (-0.40, -0.21); <0.001                                     | -0.25 (-0.34, -0.17); <0.001                          | -0.26 (-0.38, -0.15); <0.001                                     |
| Difference in post-stroke slope relative to TIS (TSS; SD/y) | -0.046 (-0.068, -0.023); <0.001                                  | -0.038 (-0.057, -0.018); <0.001                       | -0.063 (-0.095, -0.032); 0.003                                   |

Note. Global cognition z-scores were the outcome. The adjusted models included baseline age, sex, education, ethno-racial group, study entry period, diabetes, hypertension, CVD, high cholesterol, systolic blood pressure, APOE4, depression, physical activity, and alcohol use.

<sup>a</sup> Additional interpretation of model coefficients: TIS (time in study)=rate of decline over stroke-free trajectory; stroke=difference in intercepts between stroke-free and post-stroke trajectories when TSS (time since stroke)=0; TSS=effect of stroke on rate of decline.

<sup>b</sup> EPIDEMCA did not collect data on CVD and hence in the complete data analysis (sensitivity analysis 1), the study was not included. EPIDEMCA also has  $>50\%$  loss to follow and was therefore excluded in sensitivity analysis 3.

<sup>c</sup> The excluded studies with  $>50\%$  loss to follow up (and had global cognition scores) were EAS, EPIDEMCA, and ESPRIT. MYHAT had a long follow-up schedule with 13 waves, and they had  $<50\%$  followed up at the last wave, but  $>50\%$  at wave 6, therefore we did not exclude this study in the sensitivity analysis. See eTable 1 for full study names.

**eTable 17. Adjusted Estimates of Changes in Cognitive Function in the 4 Cognitive Domains and MMSE Among all Participants**

| <b>Measure (model variable) <sup>a</sup></b>                | <b>Memory</b>                            | <b>Language</b>                          | <b>Processing speed</b>                  | <b>Executive function</b>                | <b>MMSE</b>                              |
|-------------------------------------------------------------|------------------------------------------|------------------------------------------|------------------------------------------|------------------------------------------|------------------------------------------|
| N <sup>b</sup>                                              | 19,327 (13 studies)                      | 10,455 (9 studies)                       | 10,824 (8 studies)                       | 10,166 (7 studies)                       | 19,835 (12 studies)                      |
|                                                             | <b>Coefficient (95% CI);<br/>p-value</b> | <b>Coefficient (95% CI);<br/>p-value</b> | <b>Coefficient (95% CI);<br/>p-value</b> | <b>Coefficient (95% CI);<br/>p-value</b> | <b>Coefficient (95% CI);<br/>p-value</b> |
| Slope without incident stroke (TIS; SD/y)                   | -0.031 (-0.034, -0.029);<br><0.001       | -0.043 (-0.045, -0.040);<br><0.001       | -0.037 (-0.040, -0.035);<br><0.001       | -0.053 (-0.055, -0.051);<br><0.001       | -0.019 (-0.021, -0.017);<br><0.001       |
| Acute effect of stroke on cognitive level (stroke; SD)      | -0.21 (-0.28, -0.14);<br><0.001          | -0.22 (-0.30, -0.14);<br><0.001          | -0.17 (-0.26, -0.080);<br><0.001         | -0.19 (-0.29, -0.083);<br><0.001         | -0.36 (-0.43, -0.29);<br><0.001          |
| Difference in post-stroke slope relative to TIS (TSS; SD/y) | -0.015 (-0.037, 0.007);<br>0.17          | -0.020 (-0.039, -0.0010);<br>0.040       | -0.055 (-0.076, -0.035);<br><0.001       | -0.030 (-0.053, -0.0074);<br>0.009       | -0.0072 (-0.024, 0.0094);<br>0.40        |
| Total post-stroke slope (TIS+TSS; SD/y)                     | -0.047 (-0.068, -0.025);<br><0.001       | -0.063 (-0.082, -0.044);<br><0.001       | -0.093 (-0.11, -0.072);<br><0.001        | -0.083 (-0.11, -0.060);<br><0.001        | -0.027 (-0.043, -0.010);<br>0.002        |

Note. Cognitive scores were standardized scores (SD). TIS=time in study; TSS=time since stroke. The models adjusted for age, sex, education, ethno-racial groups, study entry period, diabetes, hypertension, high cholesterol, systolic blood pressure, CVD, APOE4 carrier status, depressive symptoms, physical activity, and alcohol use.

<sup>a</sup> Additional interpretation of model coefficients: TIS (time in study)=rate of decline over stroke-free trajectory; stroke=difference in intercepts between stroke-free and post-stroke trajectories when TSS (time since stroke)=0; TSS=effect of stroke on rate of decline.

<sup>b</sup> N is based on studies having conducted neuropsychological tests in that domain, see eTable 6 for details.



**eTable 18. Subgroup Analyses in Stroke Group and No-Stroke Group in Cognitive Domains and MMSE**

| Measure (model variable) <sup>a</sup>                       | Memory                          | Language                        | Processing speed                | Executive function              | MMSE                            |
|-------------------------------------------------------------|---------------------------------|---------------------------------|---------------------------------|---------------------------------|---------------------------------|
| <b>Stroke only</b>                                          | N=887                           | N=466                           | N=385                           | N=347                           | N=1,002                         |
| Slope without incident stroke (TIS; SD/y)                   | -0.047 (-0.062, -0.031); <0.001 | -0.049 (-0.063, -0.036); <0.001 | -0.037 (-0.054, -0.021); <0.001 | -0.050 (-0.067, -0.031); <0.001 | -0.023 (-0.036, -0.010); 0.001  |
| Acute effect of stroke on cognitive level (stroke; SD)      | -0.17 (-0.25, -0.079); <0.001   | -0.20 (-0.30, -0.10); <0.001    | -0.18 (-0.30, -0.067); 0.002    | -0.20 (-0.33, -0.064); 0.004    | -0.37 (-0.45, -0.28); <0.001    |
| Difference in post-stroke slope relative to TIS (TSS; SD/y) | -0.0020 (-0.028, 0.024); 0.88   | -0.014 (-.038, 0.0090); 0.23    | -0.054 (-0.081, -0.028); <0.001 | -0.031 (-0.060, -0.0016); 0.038 | -0.007 (-0.028, 0.014); 0.51    |
| <b>No stroke only</b>                                       | N=18,237                        | N=9989                          | N=10,439                        | N=9,819                         | N=18,833                        |
| Slope (SD/y)                                                | -0.031 (-0.033, -0.029); <0.001 | -0.042 (-0.045, -0.040); <0.001 | -0.037 (-0.040, -0.035); <0.001 | -0.053 (-0.056, -0.051); <0.001 | -0.019 (-0.021, -0.017); <0.001 |

Note. All outcomes were standardized scores (SD). The models adjusted for age, sex, education, ethno-racial groups, study entry period, diabetes, hypertension, high cholesterol, systolic blood pressure, CVD, APOE4 carrier status, depressive symptoms, physical activity, and alcohol use.

<sup>a</sup> Additional interpretation of model coefficients: TIS (time in study)=rate of decline over stroke-free trajectory; stroke=difference in intercepts between stroke-free and post-stroke trajectories when TSS (time since stroke)=0; TSS=effect of stroke on rate of decline.

**eTable 19. Examination of Moderating Effects in the Trajectory of Poststroke Cognitive Function**

| <b>Age</b>                  | <b>Coefficient (95% CI)</b> | <b>p-value</b>   |
|-----------------------------|-----------------------------|------------------|
| Age x TSS                   | NS                          | -                |
| Age x acute effect          | 0.013 (0.0017, 0.023)       | <b>0.024</b>     |
| Age x TIS                   | -0.0030 (-0.0059, -0.0052)  | <b>&lt;0.001</b> |
| ≥72 x TSS                   | NS                          | -                |
| ≥72 x acute effect          | 0.12 (-0.025, 0.26)         | 0.11             |
| ≥72 x TIS                   | -0.031 (-0.035, -0.027)     | <b>&lt;0.001</b> |
| <b>Education (in years)</b> |                             |                  |
| Education x TSS             | NS                          | -                |
| Education x acute effect    | -0.011 (-0.027, 0.004)      | 0.14             |
| Education x TIS             | -0.00 (-0.0005, 0.0006)     | 0.90             |
| <b>Diabetes</b>             |                             |                  |
| Diabetes x TSS              | NS                          | -                |
| Diabetes x acute effect     | 0.17 (-0.016, 0.34)         | 0.052            |
| Diabetes x TIS              | -0.0059 (-0.012, -0.0001)   | 0.0045           |
| <b>Hypertension</b>         |                             |                  |
| Hypertension x TSS          | 0.035 (-0.0044, 0.075)      | 0.081            |
| Hypertension x acute effect | NS                          | -                |
| Hypertension x TIS          | -0.0082 (-0.012, -0.0041)   | <b>&lt;0.001</b> |
| <b>APOE4 carrier</b>        |                             |                  |
| APOE4 x TSS                 | -0.049 (-0.10, 0.045)       | 0.072            |
| APOE 4 x acute effect       | NS                          | -                |
| APOE4 x TIS                 | -0.014 (-0.019, -0.0090)    | <b>&lt;0.001</b> |
| <b>Depressive symptoms</b>  |                             |                  |
| Depress x TSS               | NS                          | -                |
| Depress x acute effect      | -0.11 (-0.32, 0.072)        | 0.24             |
| Depress x TIS               | -0.0074 (-0.012, -0.0024)   | 0.004            |

**Not significant (at  $p < 0.2$ ) for the interactions between both TSS and acute effect with the following factors:** sex, high cholesterol, cardiovascular disease, smoking

Interactions with TIS were significant:

TIS x cholesterol: -0.007 (-0.011, -0.003);  $< 0.001$

TIS x CVD: -0.005 (-0.010, -0.0005); 0.029

TIS x smoking: -0.006 (-0.010, -0.003); 0.001

Note. Global cognition was used as the outcome (n=10,814 from 8 studies). NS=not significant at  $p < 0.2$  and taken out of the model. Only results  $p < 0.2$  were kept in the model and shown above. TIS= time in study and represents the rate of change over time when there was no previous stroke in all participants; model coefficient of TSS denotes the post-stroke slope compared with TIS. Acute effect = model estimated acute change at time of stroke. Each model adjusted for baseline age, sex, education, ethno-racial group, study entry period, diabetes, hypertension, high cholesterol, systolic blood pressure, CVD, APOE4 status, depression, physical activity, and alcohol use.

**eTable 20. Stratified Analyses for Age Groups With Global Cognition as the Outcome**

| <b>&lt; 72 years</b><br>N=4652 (8 studies) |                                 | <b>≥ 72 years</b><br>N=6162 (7 studies) |                                 |
|--------------------------------------------|---------------------------------|-----------------------------------------|---------------------------------|
| Acute effect                               | -0.33 (-0.47, -0.19); <0.001    | Acute effect                            | -0.19 (-0.29, -0.092); <0.001   |
| TSS                                        | -0.025 (-0.055, 0.005); 0.11    | TSS                                     | -0.042 (-0.066, -0.017); 0.001  |
| TIS                                        | -0.034 (-0.036, -0.031); <0.001 | TIS                                     | -0.063 (-0.066, -0.061); <0.001 |
| Intercept <sup>a</sup>                     | 0.38 (0.12, 0.64); 0.005        | Intercept <sup>a</sup>                  | -0.10 (-0.46, 0.25); 0.50       |

TIS= time in study and represents the rate of change over time when there was no previous stroke in all participants; TSS denotes the rate of change in global cognition scores (SD/year) after stroke compared with TIS. Acute effect = acute effect of stroke on cognitive level.

<sup>a</sup> Intercept values are based on model using covariates centered at the mean.

**eTable 21. Stratified Analyses for Diabetes Groups With Global Cognition as the Outcome**

| <b>With diabetes</b><br>N=1059 (7 studies) |                                 | <b>Without diabetes</b><br>N=7017 (7 studies) |                                 |
|--------------------------------------------|---------------------------------|-----------------------------------------------|---------------------------------|
| Acute effect                               | -0.12 (-0.34, 0.093); 0.26      | Acute effect                                  | -0.35 (-0.46, -0.24); <0.001    |
| TSS                                        | -0.078 (-0.13, -0.025); 0.004   | TSS                                           | -0.037 (-0.062, -0.012); 0.004  |
| TIS                                        | -0.056 (-0.063, -0.050); <0.001 | TIS                                           | -0.049 (-0.051, -0.046); <0.001 |
| Intercept <sup>a</sup>                     | -0.34 (-0.83, 0.15); 0.17       | Intercept <sup>a</sup>                        | -0.11 (-0.50, 0.27); 0.57       |

Note. MI was not used since sample varies between different imputations. TIS= time in study and represents the rate of change over time when there was no previous stroke in all participants; TSS denotes the rate of change in global cognition scores (SD/year) after stroke compared with TIS. Acute effect = acute effect of stroke on cognitive level.

<sup>a</sup> Intercept values are based on model using covariates centered at the mean.

**eFigure 1. Follow-up Schedule for Each Contributing Study**

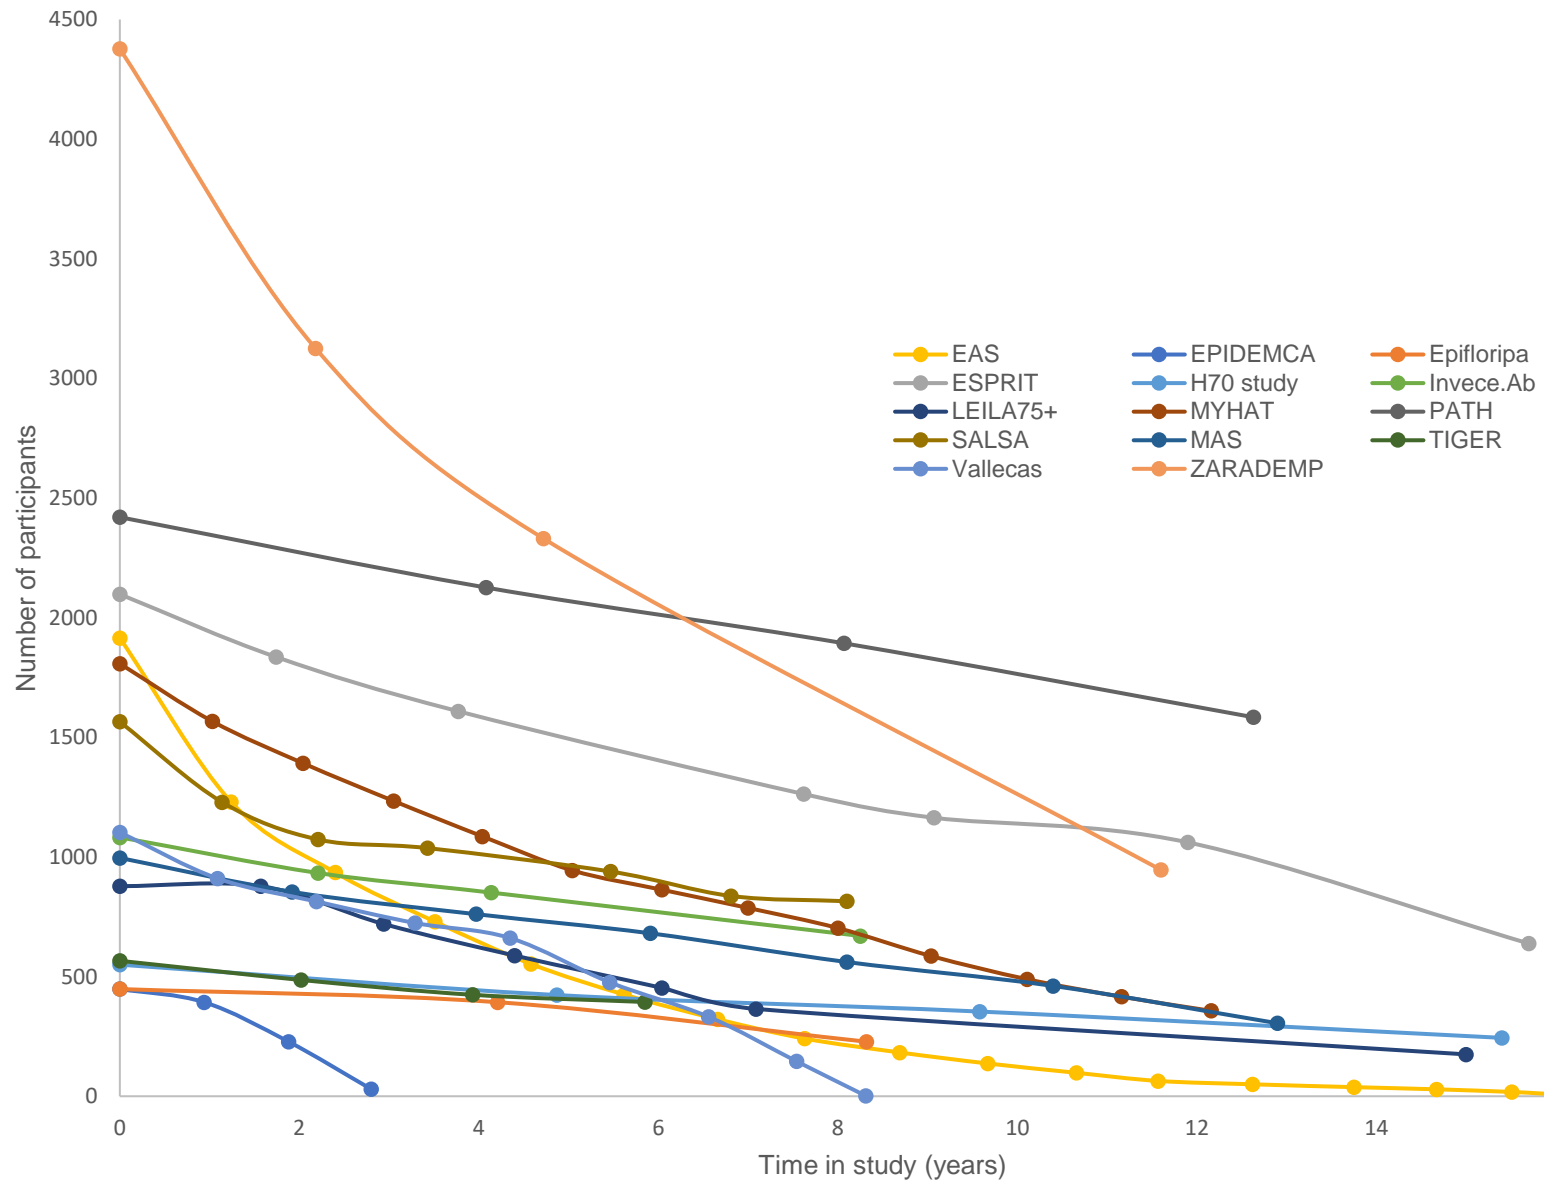

**eFigure 2. Predicted Values of Global Cognition for Participants Aged Younger Than 72 and 72 Years and Older**

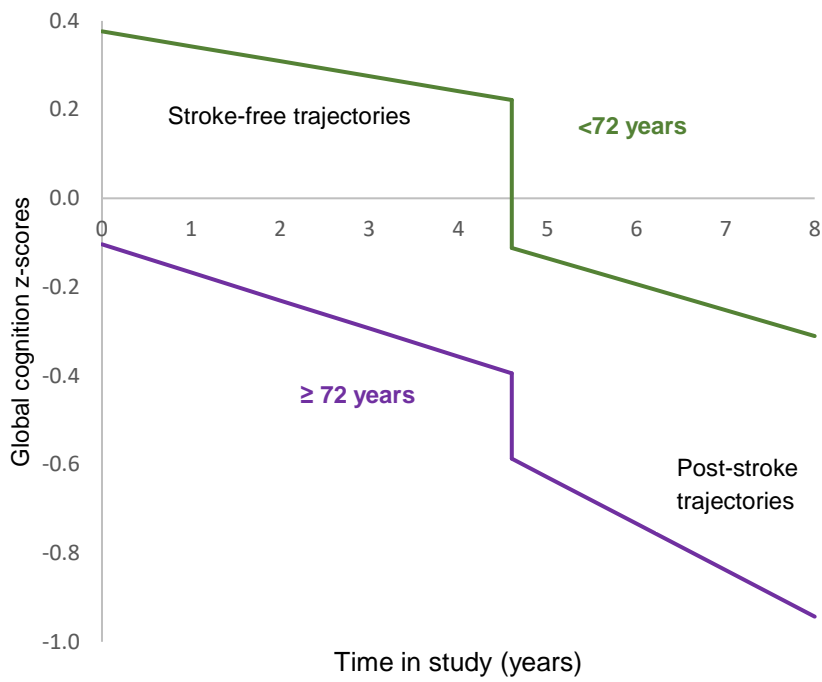

Note. Predicted values of global cognition scores were calculated for common values of covariates at baseline (based on sample with global cognition data). The estimates were calculated for stroke occurring at 4.6 years into the study.

**eFigure 3. Predicted Values of Global Cognition for Participants With and Without Diabetes**

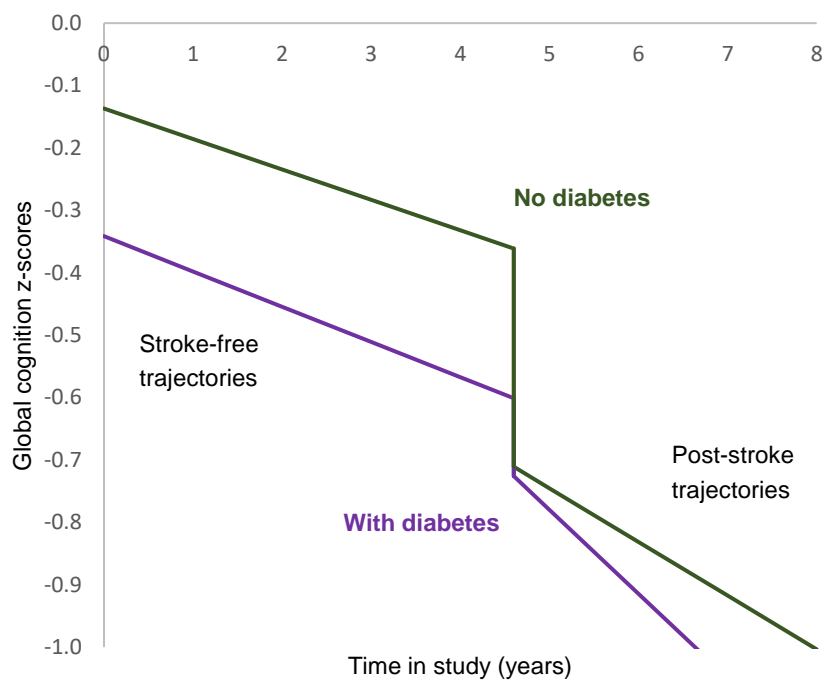

Note. Predicted values of global cognition scores were calculated for common values of covariates at baseline (based on sample with global cognition data). The estimates were calculated for stroke occurring at 4.6 years into the study.

**eFigure 4. Predicted Values of Global Cognition Among all Participants and in Subgroups, With 95% CI**

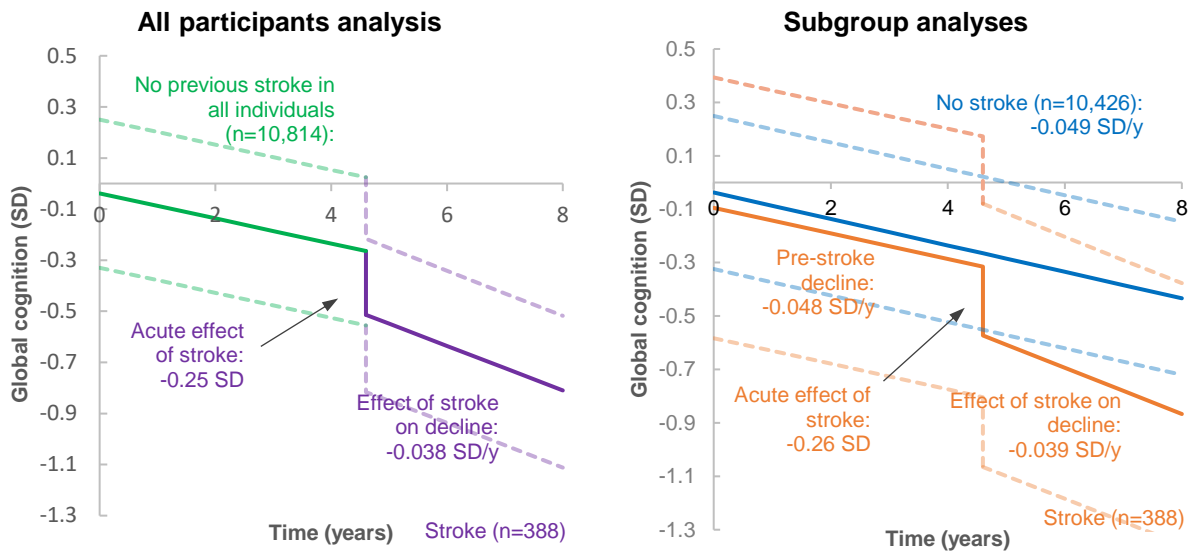

Note. Predicted values of cognition scores were calculated for common values of covariates at baseline and for stroke occurring at 4.6 years into the study. Common values were based on subsample with global cognition data, see eTable 14. The large size of the CIs is primarily due to the large standard error of the intercept (when TIS = 0).



**eFigure 5. Predicted Values of Cognitive Function in Each Domain and MMSE Among all Participants, With 95% CI**

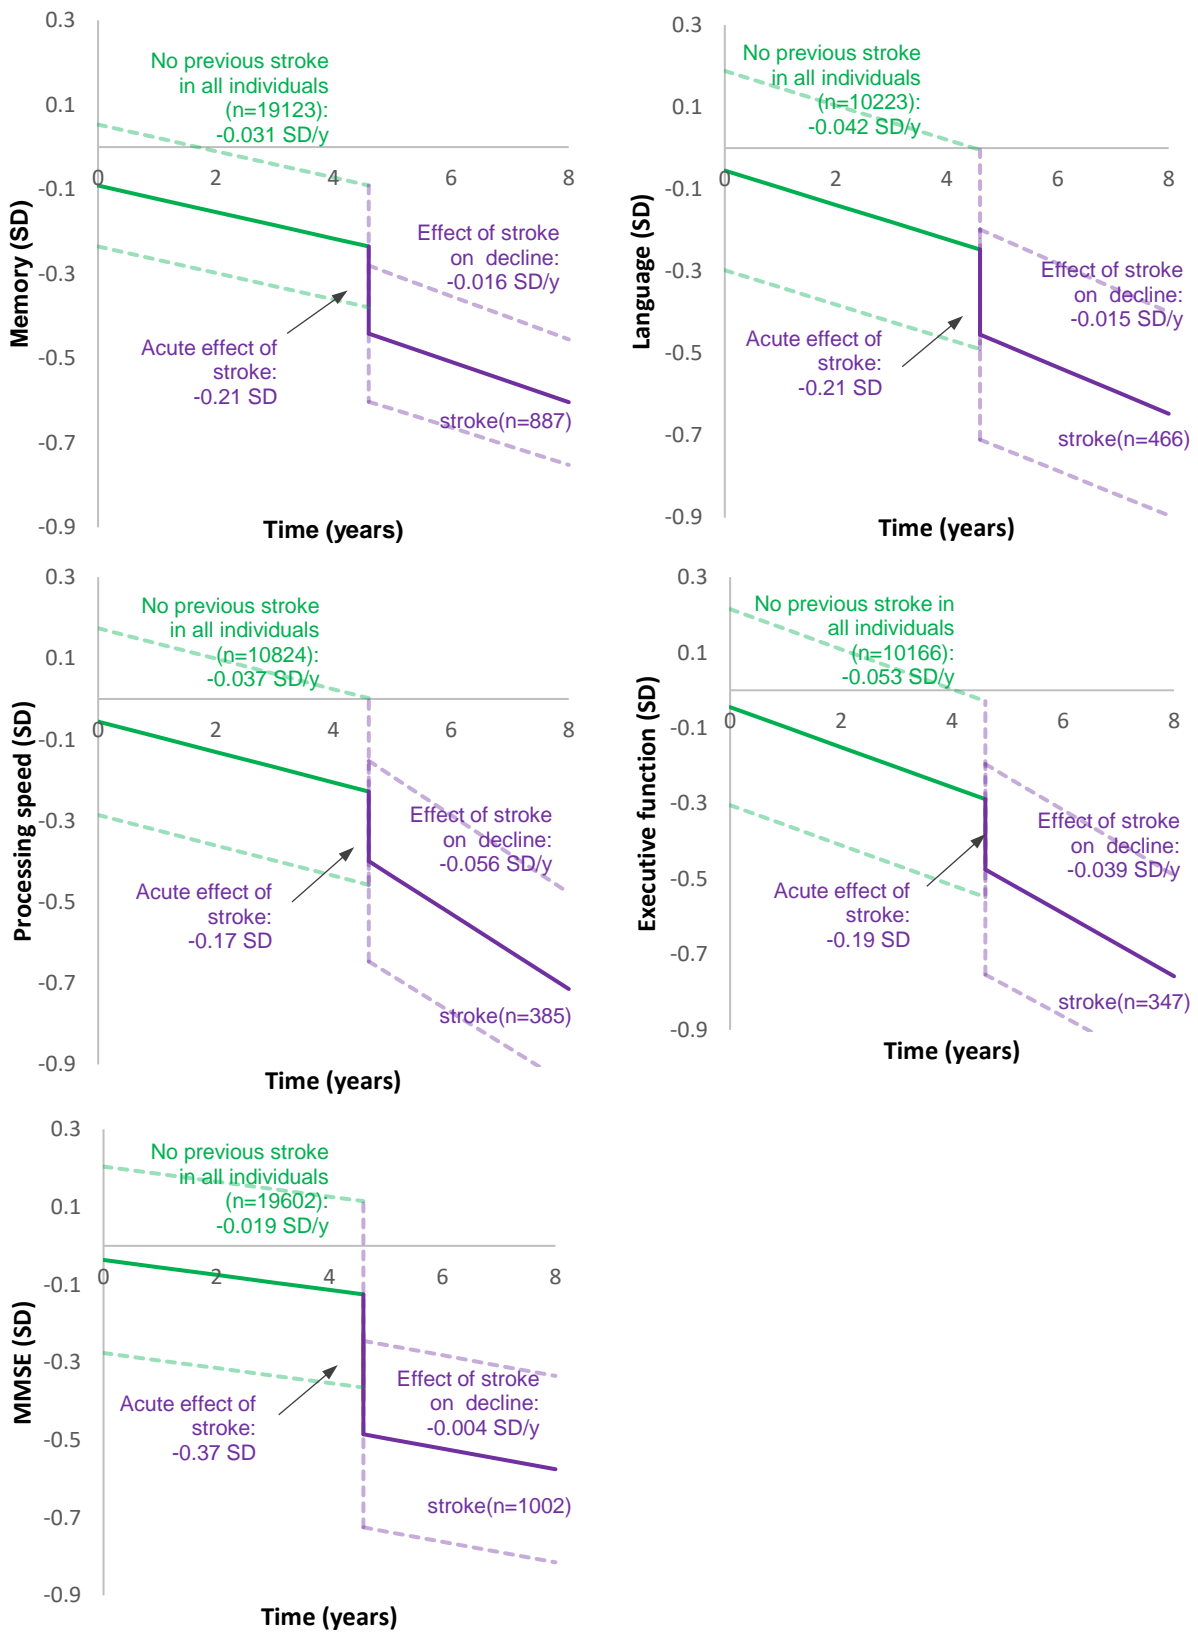

Note. Dotted lines denote 95% confidence intervals (CI). Predicted values of cognition scores were calculated for common values of covariates at baseline and for stroke occurring at 4.6 years into the study. Common values were based on subsample with global cognition data, see eTable 14. The large size of the CIs is primarily due to the large standard error of the intercept (when TIS = 0).
