# Supplementary material for: Trajectory of Cognitive Decline Before and After Stroke in 14 Population Cohorts
Source: PubMed Central journal article supplement (PMC11447567; doi:10.1001/jamanetworkopen.2024.37133), 2024-10-02
Supplement: jamanetwopen-e2437133-s002.pdf [file jamanetwopen-e2437133-s002.pdf]

## Data Sharing Statement

Lo. Trajectory of Cognitive Decline Before and After Stroke in 14 Population Cohorts. *JAMA Netw Open*. Published October 02, 2024. doi:10.1001/jamanetworkopen.2024.37133

### Data

**Data available:** No

### Additional Information

**Explanation for why data not available:** Individual patient data from included studies may be accessed upon an application via the COSMIC consortium.
